# Supplementary material for: Water-assisted proton conductivity of two highly stable imidazole multi-carboxylate-based MOFs
Source: Royal Society of Chemistry journal article supplement (doi:10.1039/c9nj00400a), 2019-01-01
Supplement: c9nj00400a1.pdf [file c9nj00400a1.pdf]

## **Water-assisted proton conductivity of two highly stable imidazole multi-carboxylate-based MOFs**

**Yin Qin,<sup>a</sup> Yilin Li,<sup>b</sup> Kaimeng Guo,<sup>a</sup> Huabiao Tang,<sup>a</sup> Lifen Hou,<sup>a</sup> Gang Li<sup>\*a</sup>**

*<sup>a</sup> College of Chemistry and Molecular Engineering, Zhengzhou University, Zhengzhou 450001,  
Henan, China*

*<sup>b</sup> Reading Academy, Nanjing University of Information Science & Technology, Nanjing 210044  
Jiangsu, China*

### **Supporting Information**

**\*To whom correspondence should be addressed.**

**E-mail: gangli@zzu.edu.cn**

**Table S1.** Selected bond distances (Å) and angles (deg) for compound **1**

|                   |           |                   |           |
|-------------------|-----------|-------------------|-----------|
| Mn(1)-N(1)        | 2.272(2)  | Mn(1)-O(7)        | 2.171(2)  |
| Mn(1)-N(3)        | 2.219(2)  | Mn(1)-O(8)        | 2.187(2)  |
| Mn(1)-O(1)        | 2.247(2)  | O(5)#2-Mn(1)-O(1) | 85.37(8)  |
| Mn(1)-O(5)#2      | 2.161(2)  | O(5)#2-Mn(1)-O7   | 172.90(8) |
| N(3)-Mn(1)-N(1)   | 96.14(9)  | O(5)#2-Mn(1)-O(8) | 86.54(8)  |
| N(3)-Mn(1)-O(1)   | 170.04(9) | O(7)-Mn(1)-N(1)   | 93.47(9)  |
| O(1)-Mn(1)-N(1)   | 74.38(8)  | O(7)-Mn(1)-N(3)   | 94.71(9)  |
| O(5)#2-Mn(1)-N(1) | 89.19(8)  | O(7)-Mn(1)-O(1)   | 89.00(8)  |
| O(5)#2-Mn(1)-N(3) | 91.55(9)  | O(8)-Mn(1)-N(3)   | 92.16(9)  |
| O(7)-Mn(1)-O(8)   | 89.86(9)  | O(8)-Mn(1)-O(1)   | 97.09(8)  |
| O(8)-Mn(1)-N(1)   | 170.77(8) |                   |           |

Symmetry codes: #1: -X, 2-Y, 1-Z; #2: -X, 2-Y, -Z

**Table S2.** Hydrogen bonding parameters for **1**

| D-H...A              | d(H...A) | d(D...A) | ∠(DHA) |
|----------------------|----------|----------|--------|
| N(2)H(2)...O(11) #1  | 2.00     | 2.850(4) | 167.3  |
| O(3)H(3)...O(2)      | 1.70(4)  | 2.516(3) | 175(4) |
| O(7)H(7A)...O(10) #2 | 1.93     | 2.675(4) | 142.5  |
| O(7)H(7B)...O(3) #3  | 2.87     | 3.566(3) | 154.0  |
| O(7)H(7B)...O(4) #3  | 2.12     | 2.822(3) | 153.0  |
| O(8)H(8B)...O(1) #4  | 1.95     | 2.778(3) | 159.6  |
| O(10)H(10A)...O(9)   | 1.88     | 2.730(6) | 161.9  |
| O(10)H(10B)...O(2)#5 | 2.38     | 3.231(4) | 155.7  |
| O(11)H(11A)...O(6)#1 | 2.15     | 2.882(5) | 141.4  |

Symmetry codes: #1: 1-X, 2-Y, 1-Z; #2: 1-X, 1-Y, 1-Z; #3: 1-X, 2-Y, -Z; #4: -X, 1-Y, -Z; #5 1+X, +Y, 1+Z

**Table S3.** Selected bond distances (Å) and angles (deg) for compound **2**

|                      |            |                     |            |
|----------------------|------------|---------------------|------------|
| N(1)-Zn(1)           | 2.050(2)   | O(1)-Zn(1)          | 2.149(2)   |
| N(2)-Zn(2)           | 2.000(2)   | O(5)-Zn(1)#2        | 1.956(2)   |
| N(3)-Zn(1)           | 2.093(3)   | O(7)-Zn(2)          | 2.488(3)   |
| N(4)-Zn(1)           | 2.144(3)   | O(10)-Zn(3)         | 2.303(2)   |
| N(5)-Zn(2)           | 2.027(2)   | Zn(1)-O(5)#2        | 1.956(2)   |
| N(6)-Zn(3)           | 2.045(2)   | Zn(3)-N(6)#1        | 2.045(2)   |
| N(7)-Zn(2)           | 2.112(3)   | Zn(3)-N(9)#1        | 2.275(7)   |
| N(8)-Zn(2)           | 2.095(3)   | Zn(3)-O(10)#1       | 2.303(2)   |
| N(9)-Zn(3)           | 2.275(7)   | N(2)-Zn(2)-N(5)     | 138.94(10) |
| N(1)-Zn(1)-N(3)      | 121.80(9)  | N(2)-Zn(2)-N(7)     | 113.73(11) |
| N(1)-Zn(1)-N(4)      | 101.69(10) | N(2)-Zn(2)-N(8)     | 105.42(10) |
| N(1)-Zn(1)-O(1)      | 80.21(9)   | N(2)-Zn(2)-O(7)     | 81.95(9)   |
| N(3)-Zn(1)-N(4)      | 77.06(10)  | N(5)-Zn(2)-N(7)     | 98.24(11)  |
| N(3)-Zn(1)-O(1)      | 91.00(10)  | N(5)-Zn(2)-N(8)     | 105.89(10) |
| N(4)-Zn(1)-O(1)      | 167.06(10) | N(5)-Zn(2)-O(7)     | 74.45(9)   |
| O(5)#2-Zn(1)-N(1)    | 106.17(9)  | N(7)-Zn(2)-O(7)     | 86.94(12)  |
| O(5)#2-Zn(1)-N(3)    | 132.01(10) | N(8)-Zn2-N(7)       | 78.05(12)  |
| O(5)#2-Zn(1)-N(4)    | 95.71(11)  | N(8)-Zn(2)-O(7)     | 164.91(11) |
| O(5)#2-Zn(1)-O(1)    | 96.02(10)  | N(6)1-Zn(3)-O(10)#1 | 76.85(9)   |
| O(10)1-Zn(3)-O(10)   | 85.28(14)  | N(6)-Zn(3)-N(6)#1   | 154.29(15) |
| N(9)-Zn(3)-N(9)#1    | 105.9(3)   | N(6)#1-Zn(3)-N(9)#1 | 100.74(17) |
| N(9)#1-Zn(3)-O(10)   | 84.43(19)  | N(6)-Zn(3)-N(9)#1   | 94.69(17)  |
| N(9)#1-Zn(3)-O(10)#1 | 169.62(19) | N(6)-Zn(3)-N(9)     | 100.74(17) |
| N(9)-Zn(3)-O(10)#1   | 84.43(19)  | N(6)#1-Zn(3)-N(9)   | 94.69(17)  |
| N(9)-Zn(3)-O(10)     | 169.62(19) | N(6)-Zn(3)-O(10)    | 76.85(9)   |
| N(6)-Zn(3)-O(10)#1   | 84.27(10)  | N(6)#1-Zn(3)-O(10)  | 84.27(10)  |

Symmetry transformations used to generate equivalent atoms: #1: +X,3/2-Y,1/2-Z; #2 1/2-X,1-Y,+Z.

**Table S4.** Hydrogen bonding parameters for **2**

| D-H...A                 | d(H...A) | d(D...A) | ∠(DHA) |
|-------------------------|----------|----------|--------|
| O(3)-H(3) ...O(2)       | 1.61(2)  | 2.499(3) | 176(5) |
| O(12)-H(12) ...O(8)#1   | 2.38     | 3.297(6) | 167.5  |
| O(14)-H(14A) ...O(9)#2  | 1.92     | 2.751(5) | 166.7  |
| O(14)-H(14A) ...O(10)#2 | 2.81     | 3.487(5) | 137.4  |
| O(14)-H(14B) ...O(15)#1 | 2.06     | 2.823(7) | 148.6  |
| O(15)-H(15A) ...O(10)#3 | 2.16     | 2.958(5) | 147.2  |
| O(15)-H(15B) ...O(4)    | 2.39     | 3.014(5) | 130.8  |
| O(8)-H(8A) ...O(9)      | 1.62(10) | 2.506(4) | 160(9) |

Symmetry codes: #1: 1/2+X,+Y,1-Z; #2 : 1/2+X,3/2-Y,1/2+Z; #3 : +X,3/2-Y,1/2-Z

Equivalent circuit LR(C(R(Q(R(C(RW))))))):

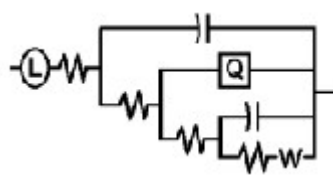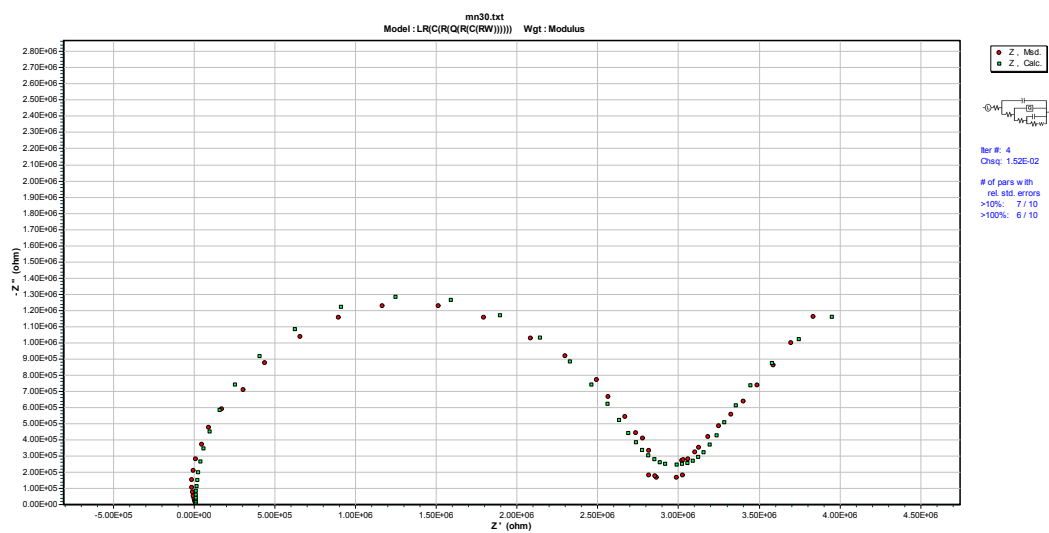

(a)

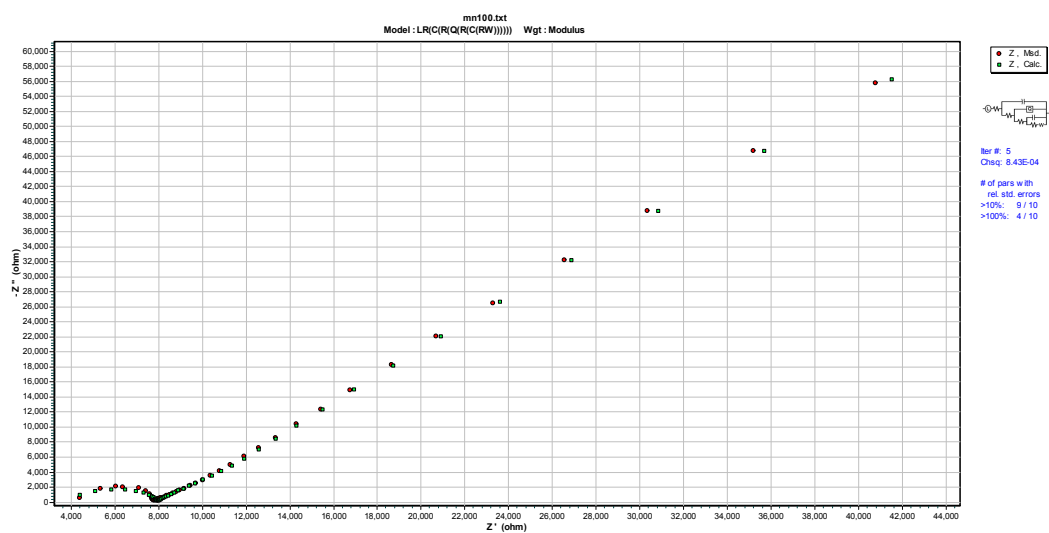

(b)

**Fig. S1** Nyquist plots for a polycrystalline sample of **1** at 30 °C (a) and 100 °C (b) and 98% RH. Red circle and green square are the measured impedance spectroscopy values and the fits of the impedance data to the equivalent circuit of LR(C(R(Q(R(C(RW)))))).

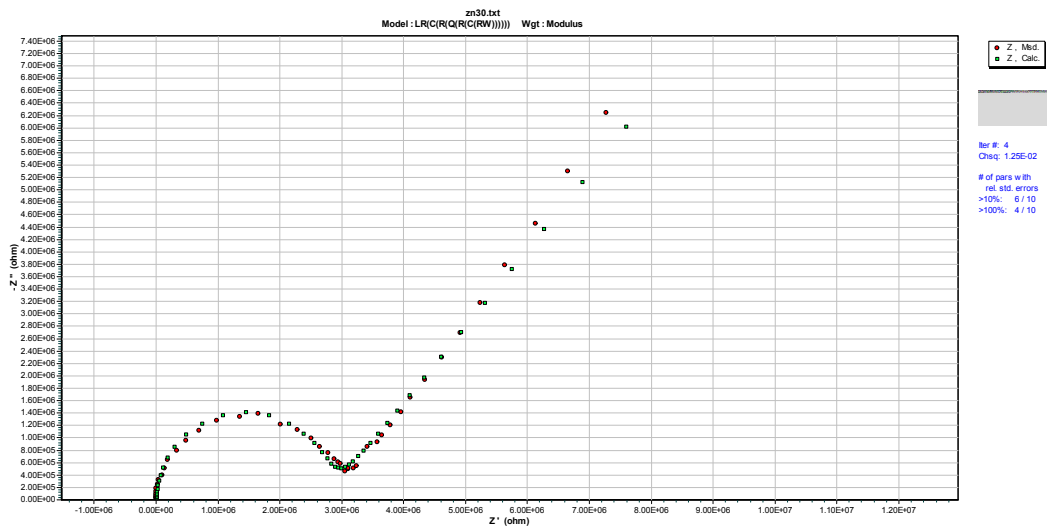

(a)

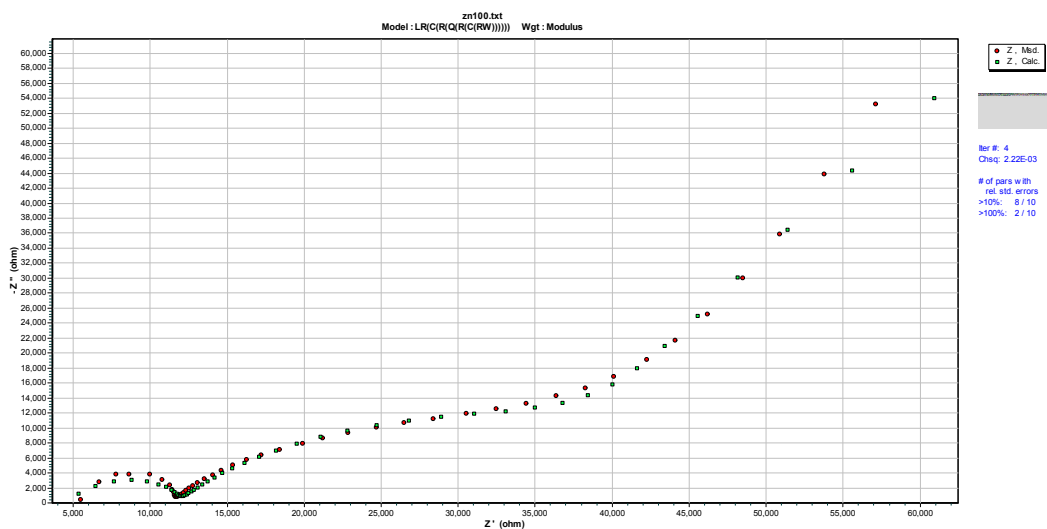

(b)

**Fig. S2** Nyquist plots for a polycrystalline sample of **1** at 30°C and 100°C and 98% RH. Red circle and green square are the measured impedance spectroscopy values and the fits of the impedance data to the equivalent circuit of LR(C(R(Q(RC(RW)))))).

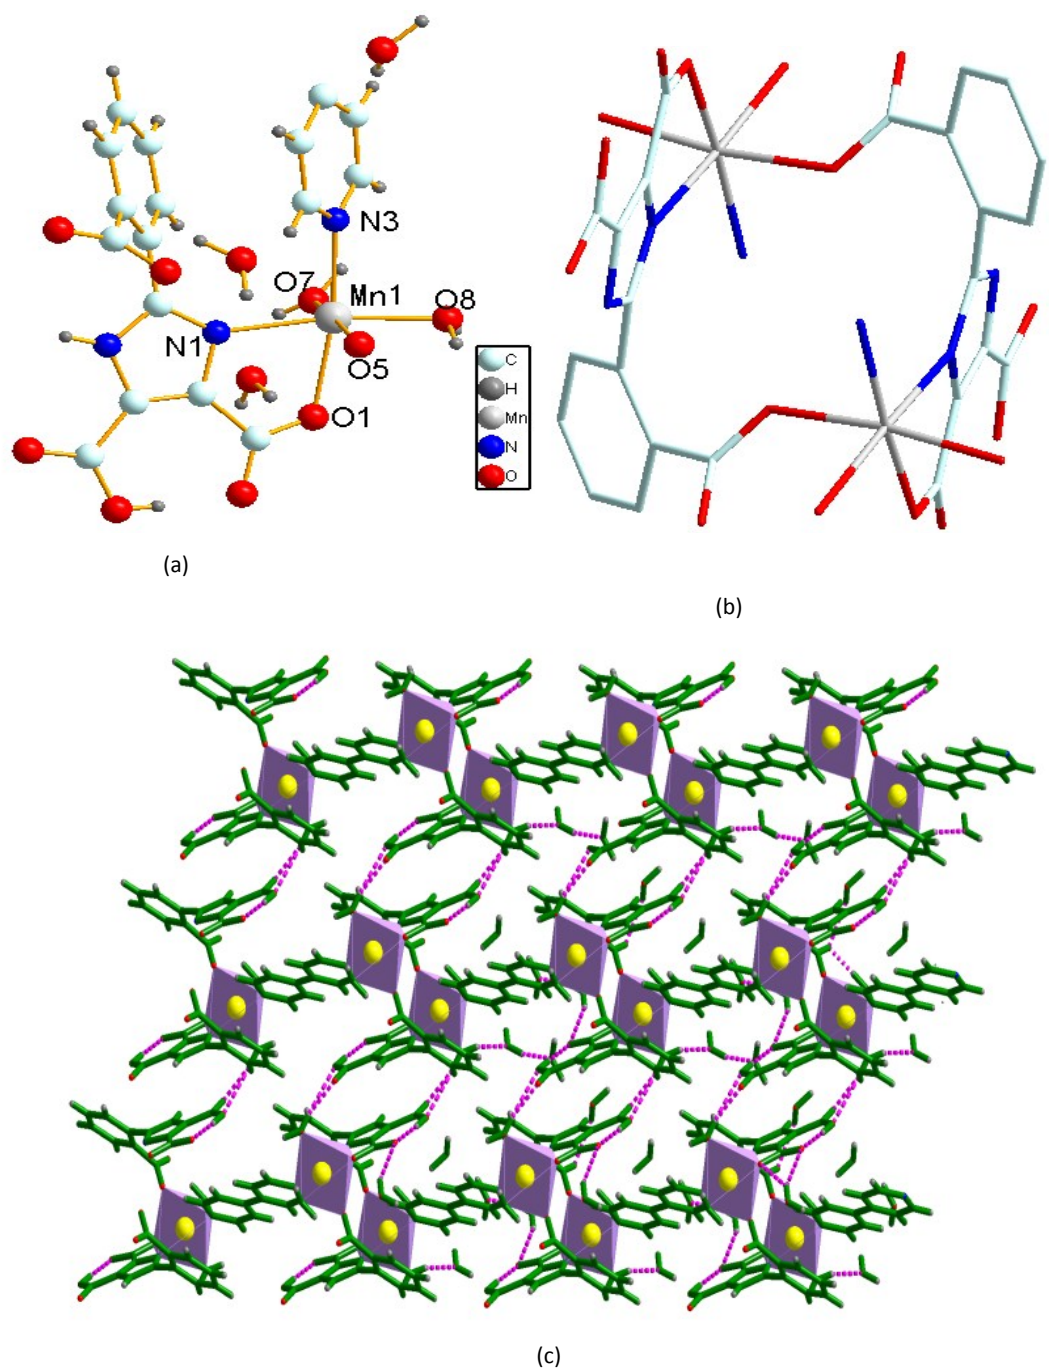

**Fig. S3** (a) Structural unit of **1**. (b) Binary structure of **1** formed by bridging ligands.(c) Two-dimensional sheet of **1** connected by H-bonds.

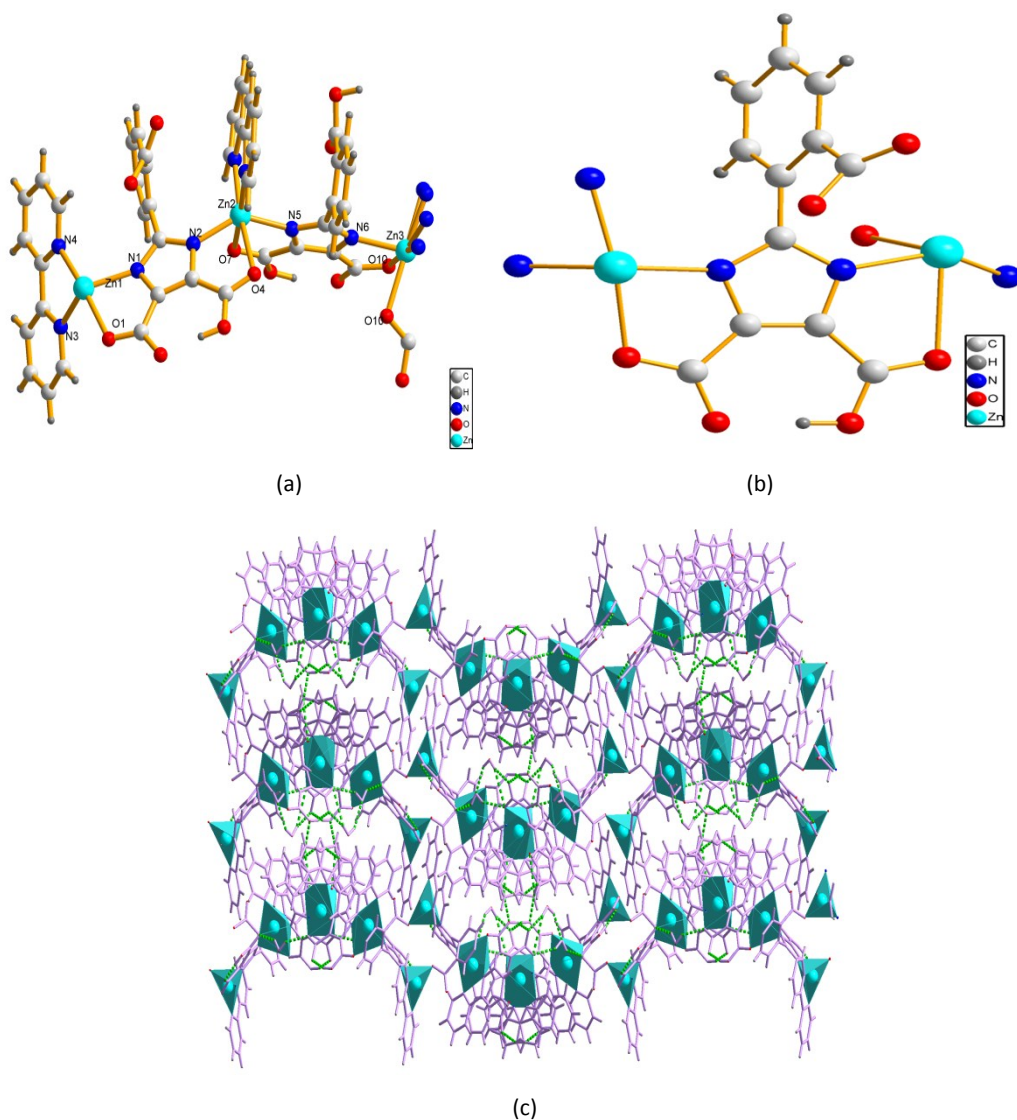

Fig. S4 (a) Structural unit of **2**. (b) Coordination mode of the imidazole multi-carboxylate ligand of **2**. (c) Two-dimensional sheet of **2** connected by H-bonds.

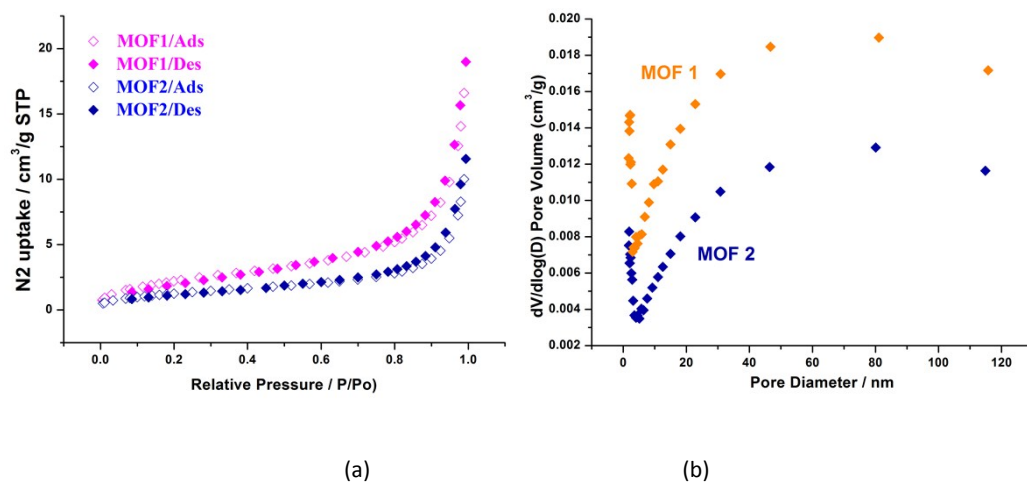

Fig. S5 Nitrogen gas adsorption and desorption isotherms at 77 K (a) and pore size distribution profiles (b) for **1**

and 2.

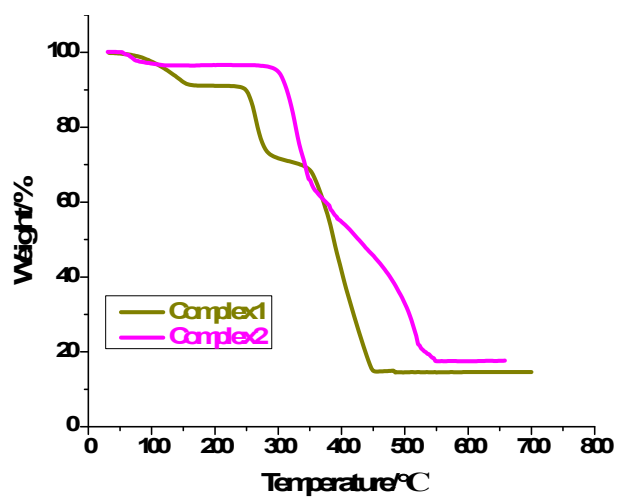

Fig. S6 The TG curves of MOFs 1 and 2.

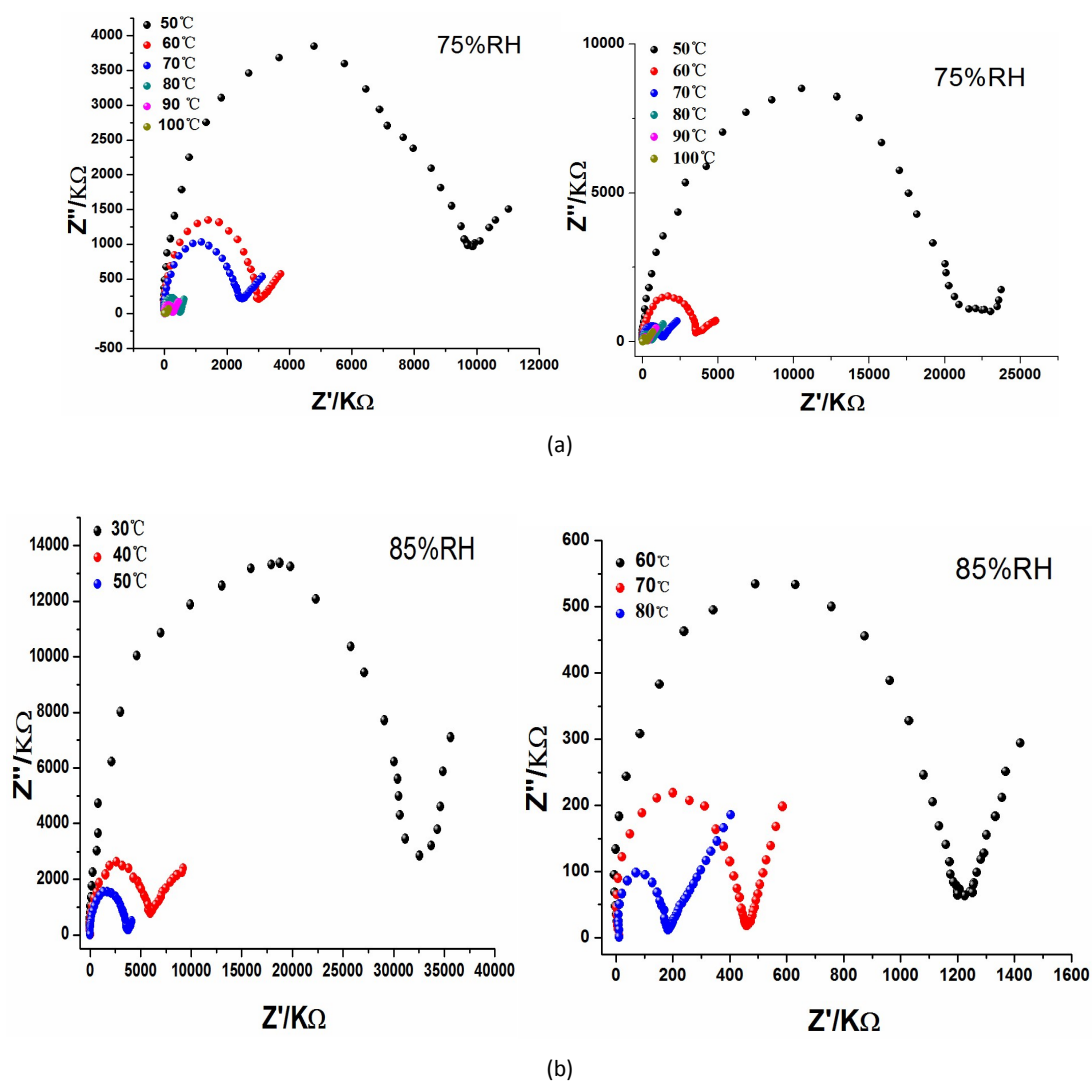



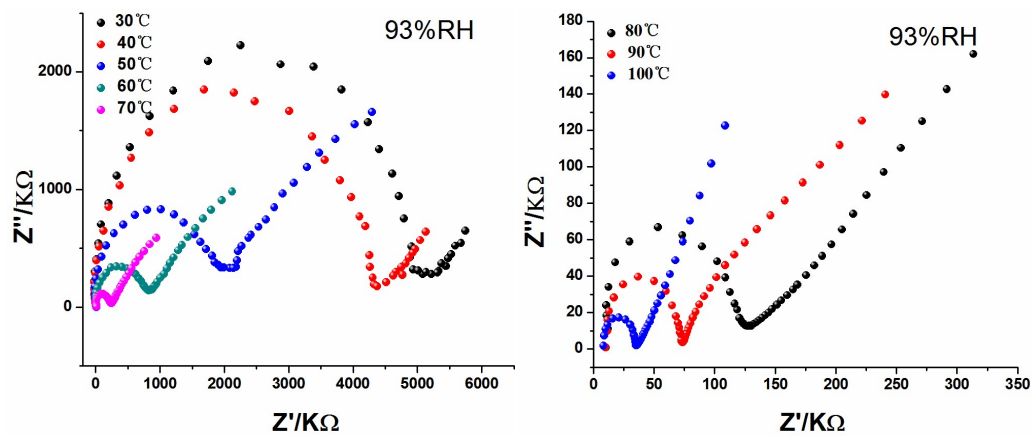

(c)

Fig. S7 Impedance spectra of 1 at 75% (a), 85% (b) and 93% RHs (c) and 30-100°C.

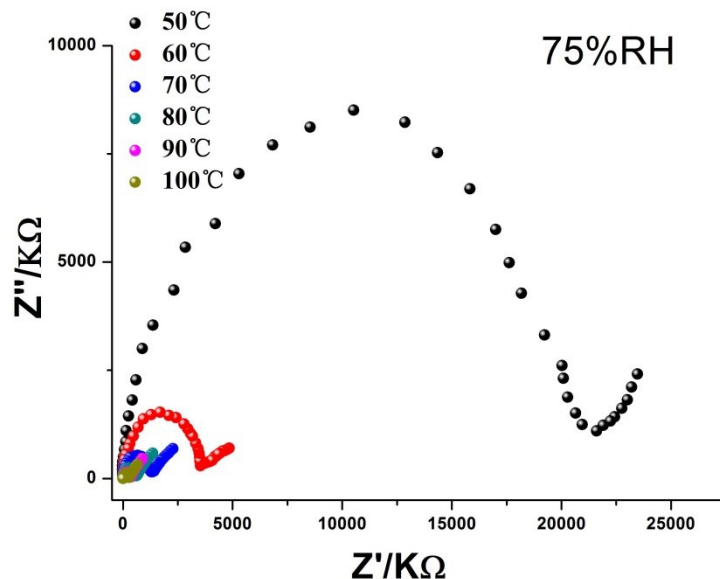

(a)

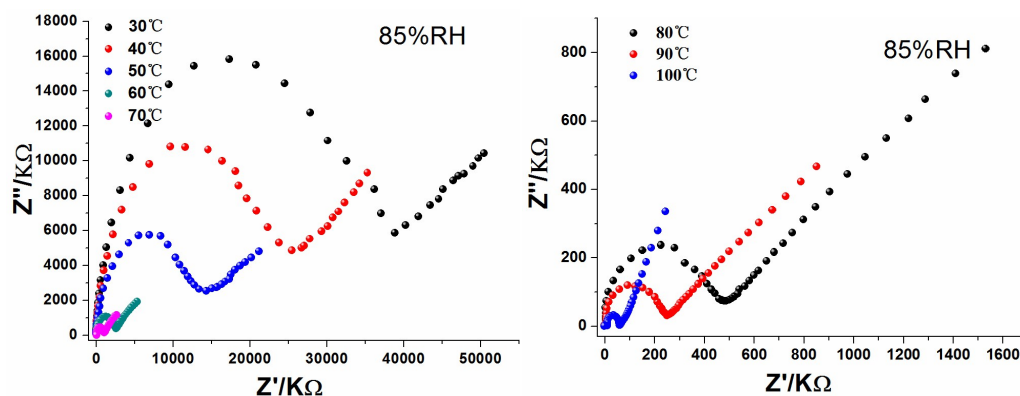

(b)

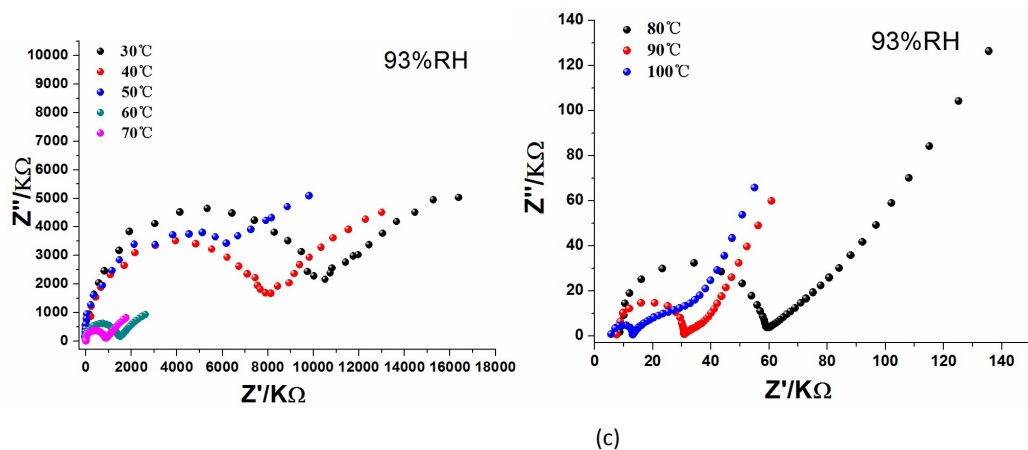

Fig. S8 Impedance spectra of **2** at 75% (a), 85% (b) and 93% RH (c) and 30-100°C.

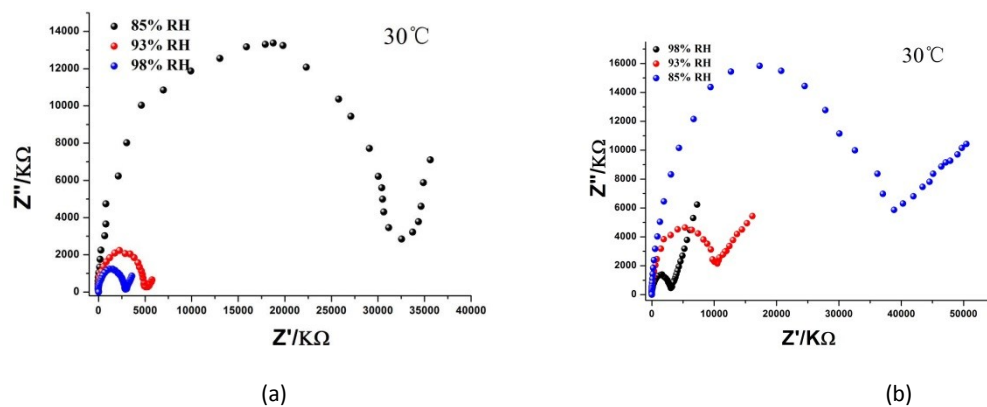

Fig. S9 Impedance spectra of **1** (a) and **2** (b) at different RHs and 30 °C.

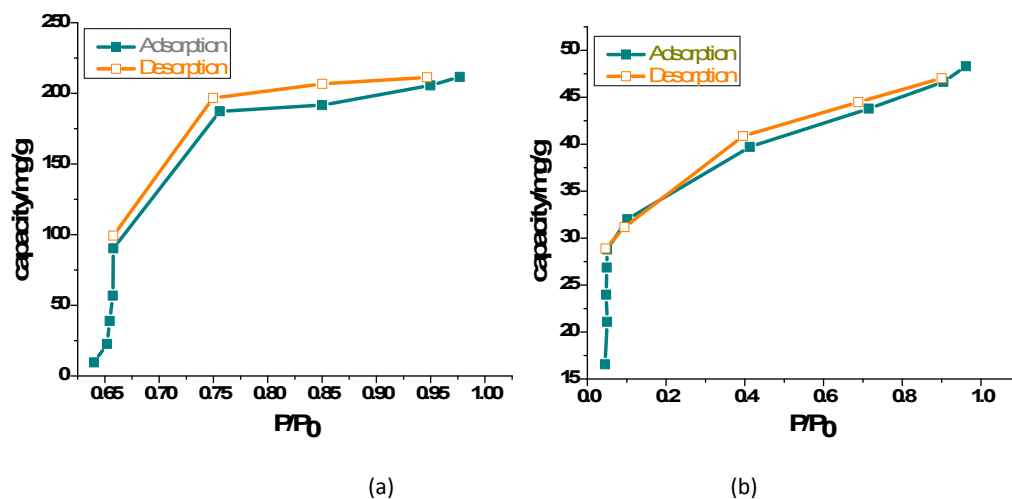

Fig. S10 The adsorption curves of MOFs **1** and **2**.

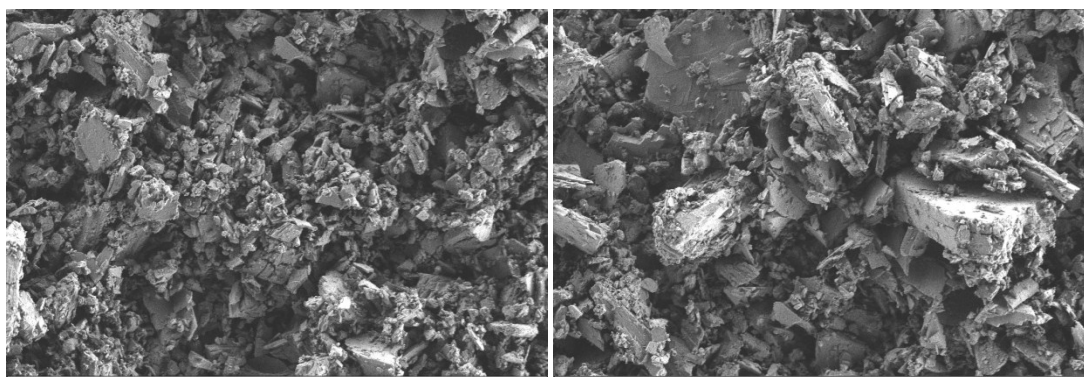

(a)

(b)

**Fig. S11** SEM images for ground powders of **1** before (a) and after (b) impedance test.

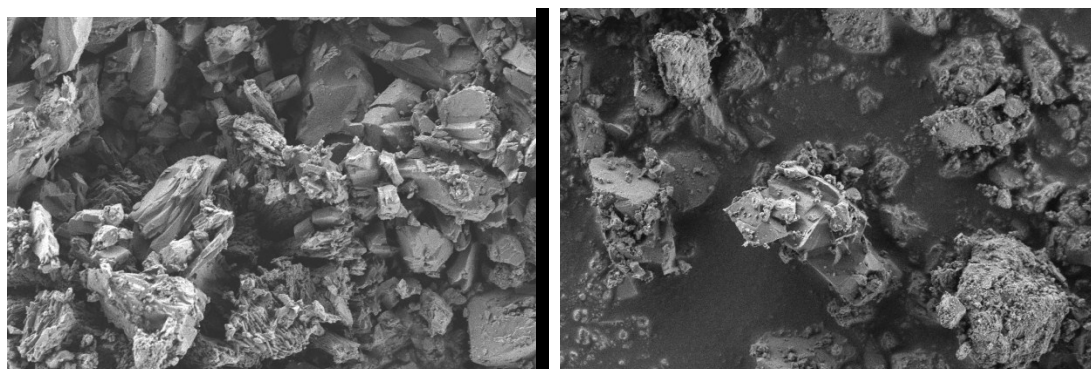

(a)

(b)

**Fig. S12** SEM images for ground powders of **2** before (a) and after (b) impedance test.
